# Supplementary material
Source: HighWire-hosted journal article supplement (https://bmjopensem.bmj.com/content/4/1/e000409)
Supplement: inline-supplementary-material-2 [file inline-supplementary-material-2.docx]

**Supplementary Digital Content 2**

**Figure 1.** Volume versus Standard Mean Difference: cardiovascular fitness

Note: SMD = standard mean difference; MET = metabolic equivalents; min = minute

**Figure 2.** Intensity versus Standard Mean Difference: cardiovascular fitness

Note: SMD = standard mean difference; MET = metabolic equivalent

**Figure 3.** Duration versus Standard Mean Difference: cardiovascular fitness

Note: SMD = standard mean difference

**Figure 4.** Volume versus Standard Mean Difference: quality of life

Note: SMD = standard mean difference; MET = metabolic equivalents; min = minute

**Figure 5.** Intensity versus Standard Mean Difference: quality of life

Note: SMD = standard mean difference; MET = metabolic equivalents

**Figure 6.** Duration versus Standard Mean Difference: quality of life

Note: SMD = standard mean difference
